# Supplementary material for: A Pilot of Digital Whiteboards for Improving Patient Satisfaction in the Emergency Department: Nonrandomized Controlled Trial
Source: PubMed Central journal article supplement (PMC10131606; doi:10.2196/44725), 2023-03-21
Supplement: formative_v7i1e44725_app4.pdf [file formative_v7i1e44725_app4.pdf]

A Pilot of Digital Whiteboards for Improving Patient Satisfaction in the Emergency Department: Non-randomized controlled trial

Appendix

*Patients that did not complete the study protocol*

|                          |           |
|--------------------------|-----------|
| <i>Mean Age</i>          | 53.7      |
| <i>Gender</i>            | 60%M/40%F |
| <b><i>Race:</i></b>      | <i>N</i>  |
| <i>White</i>             | 7         |
| <i>Black</i>             | 1         |
| <i>Asian</i>             | 0         |
| <i>Other</i>             | 2         |
| <b><i>Ethnicity:</i></b> | <i>N</i>  |
| <i>Hispanic</i>          | 2         |
| <i>Non-Hispanic</i>      | 8         |
